# Supplementary material for: Basin-Scale Control on the Phytoplankton Biomass in Lake Victoria, Africa
Source: PubMed Central journal article supplement (PMC3253787; doi:10.1371/journal.pone.0029962), 2012-01-09
Supplement: pone.0029962.s004.pdf [file pone.0029962.s004.pdf]

## Supporting Information S4 for

### Basin-scale Control on the Phytoplankton Dynamics in Lake Victoria, Africa

A. Cózar, M. Bruno, N. Bergamino, B. Úbeda, L. Bracchini, A. M. Dattilo and S. A. Loisel

#### S4. Relative influence of convective motion and wind-induced currents on the lake-wide circulation pattern.

The relative strength of convection with respect to wind-induced currents was evaluated by means of the dimensionless parameter  $B$  [S4-1]:

$$B = \left| \frac{u_*^2 L}{\beta \Delta T_w g h^2} \right|$$

where  $u_* = (\tau / \rho_w)^{1/2}$  is the surface shear velocity;  $\tau = \rho_a C_d W^2$  is the wind stress at the water surface;  $\rho_w$  and  $\rho_a$  are the densities of water and air respectively;  $C_d$  is the drag coefficient at the water surface;  $W$  is the wind speed at 10 m height;  $L$  is the length of the lake;  $h$  is the thickness of the convective cell;  $\Delta T_w$  is the difference between the surface water temperature at either end of the lake;  $\beta$  is the coefficient of thermal expansion of water at 25°C ( $2.5 \cdot 10^{-4} \text{ }^\circ\text{K}^{-1}$ ); and  $g$  is the gravitational acceleration. Lake-wide circulation is dominated by convection for  $B < 1$ , while wind-induced currents dominate for  $B > 1$ .

We use monthly water temperature estimated from AVHRR data (*LST*, Supporting Information S1), monthly wind speed obtained from the NCEP reanalysis data (Supporting Information S3), a lake length of 200 km, and a convective cell depth of 20 m. Note that a greater thickness of the convective cell would result in a lower  $B$  estimates.

The results show that  $B$  was generally less than 1 between August and November (Figure S4). Particularly low values were reached in August and September. For  $B < 1$ , the strength of the wind is insufficient to overcome the lake-wide convective circulation induced by the horizontal temperature gradient.

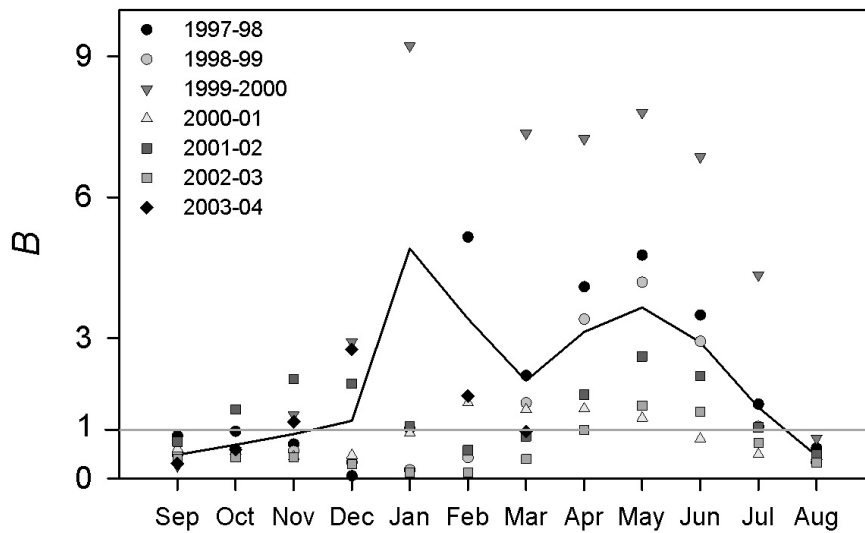

**Figure S4. Seasonal variability of  $B$  parameter in Lake Victoria for 1997-2004 period.** There are two offscale values, 14.4 in February-2000 and 21.9 in January-2004. The black line corresponds to the average seasonal variability for the study period. The horizontal grey line indicates  $B = 1$ .

**Reference for the Supporting Information S4**

S4-1. Cormack DE, Stone GP, Leal LG (1975) The effect of upper surface conditions on convection in a shallow cavity with differentially heated end-walls. *Int. J. Heat Mass Transf.* 18: 635–648.
