# Supplementary material for: Basin-Scale Control on the Phytoplankton Biomass in Lake Victoria, Africa
Source: PLOS journal article supplement (doi:10.1371/journal.pone.0029962), 2012-01-09
Supplement: S1 (10.1371/journal.pone.0029962.s001) [file journal.pone.0029962.s001]

## Supporting Information S1 for

### Basin-scale Control on the Phytoplankton Dynamics in Lake Victoria, Africa

A. Cózar, M. Bruno, N. Bergamino, B. Úbeda, L. Bracchini, A. M. Dattilo and S. A. Loiselle

#### S1. Comparison of monthly surface temperatures (*LST*) in North and South Region.

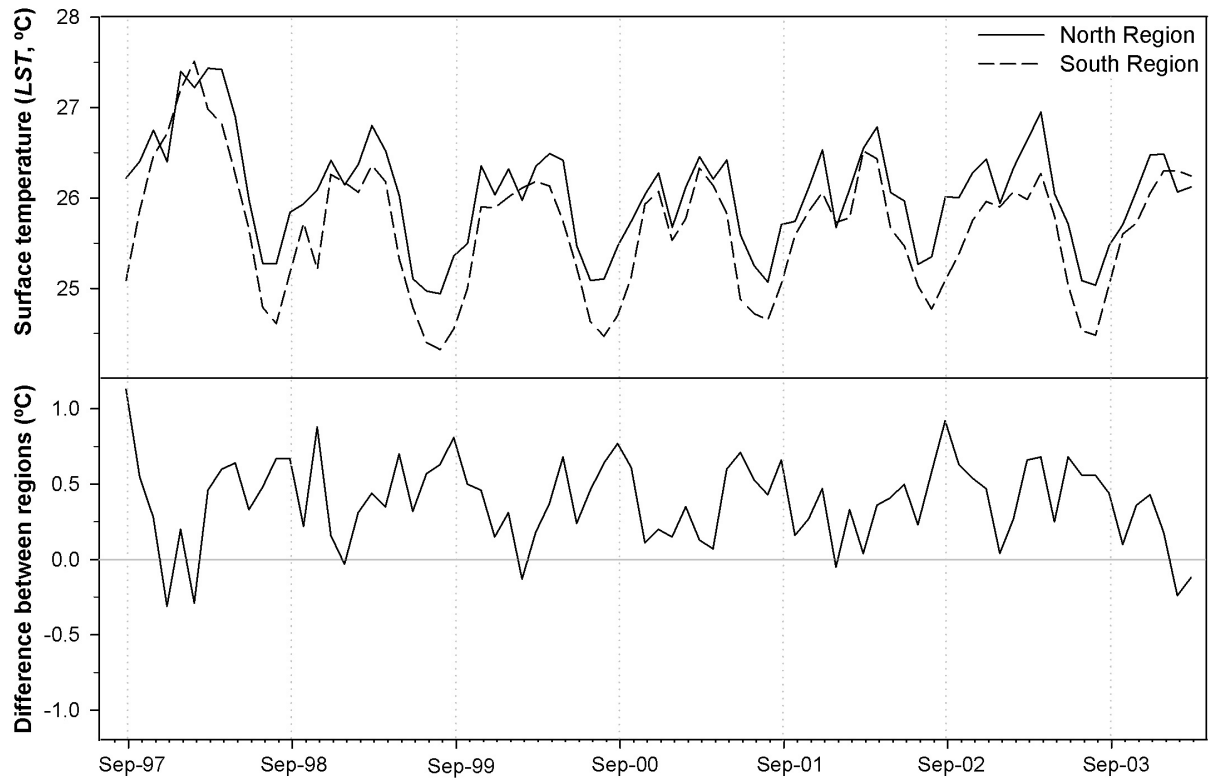

**Figure S1. Comparison of monthly surface temperatures (*LST*) in North and South Region.** Temporal variability of *LST* in the two regions and difference of *LST* between regions. Positive values of the difference indicate that surface layer in the north is warmer than in the south. *LST* were obtained using AVHRR data (<http://podaac-www.jpl.nasa.gov/sst>).
